# Supplementary material for: Interleaved Electroactive Molecules into LDH Working on Both Electrodes of an Aqueous Battery-Type Device
Source: MDPI journal article supplement (doi:10.3390/molecules28031006), 2023-01-19
Supplement: s1 [file s1]

## Supplementary information

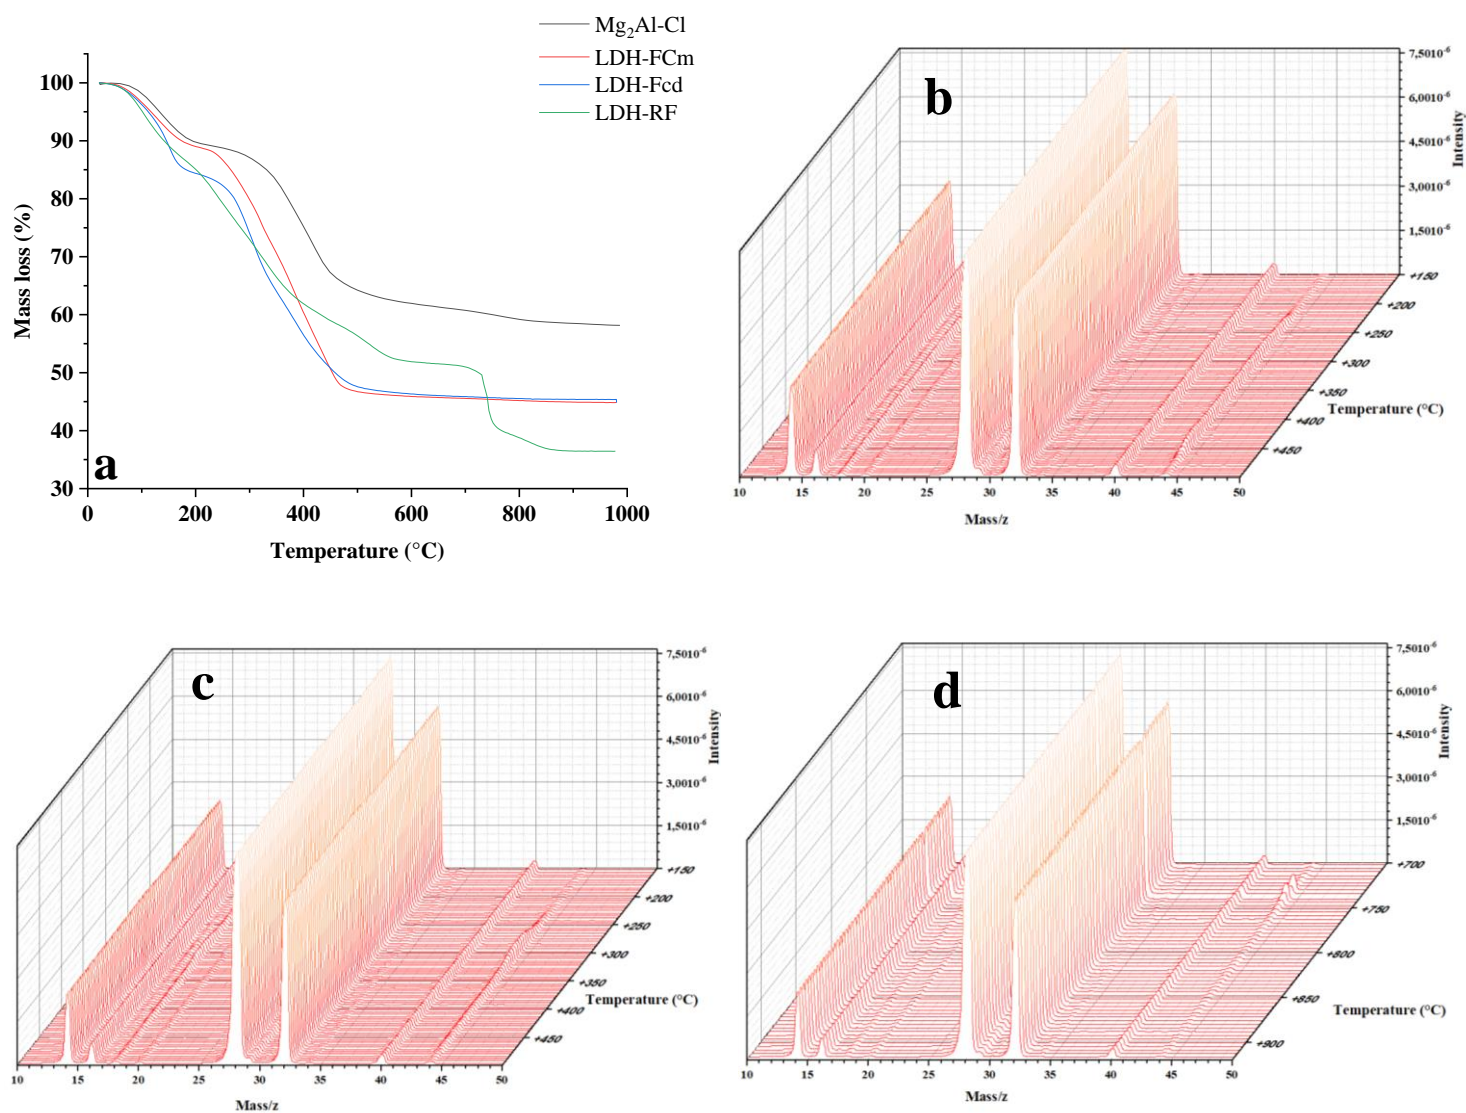

**Figure S1.** (a) TGA of LDH-Cl, LDH-RF, LDH-FCm and LDH-FCd , and stacked Mass Spectrographs as a function of the temperature for (b) LDH-RF , (c) LDH-FCm, and (d) LDH-FCd

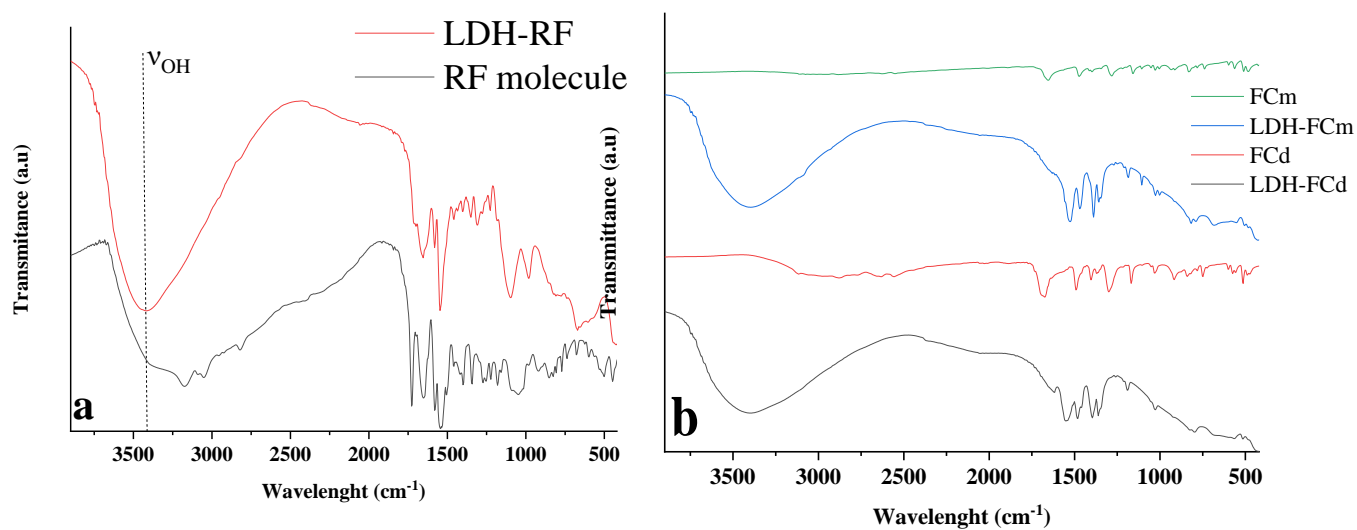

**Figure S2.** Infrared spectrum of (a) RF and LDH-RF and (b) FCm, LDH-FCm, FCd, LDH-FCd

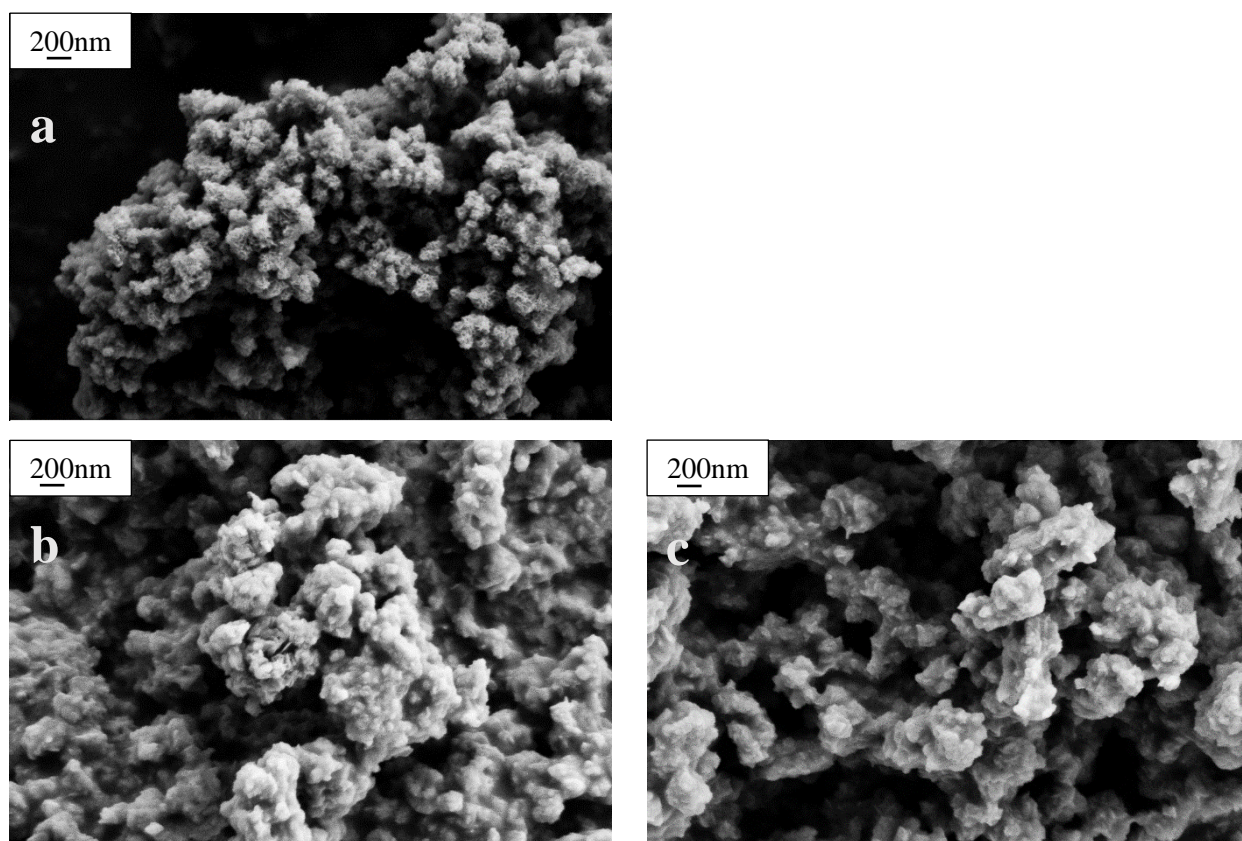

**Figure S3.** SEM images of (a) LDH-RF, (b) LDH-FCm and (c) LDH-FCd

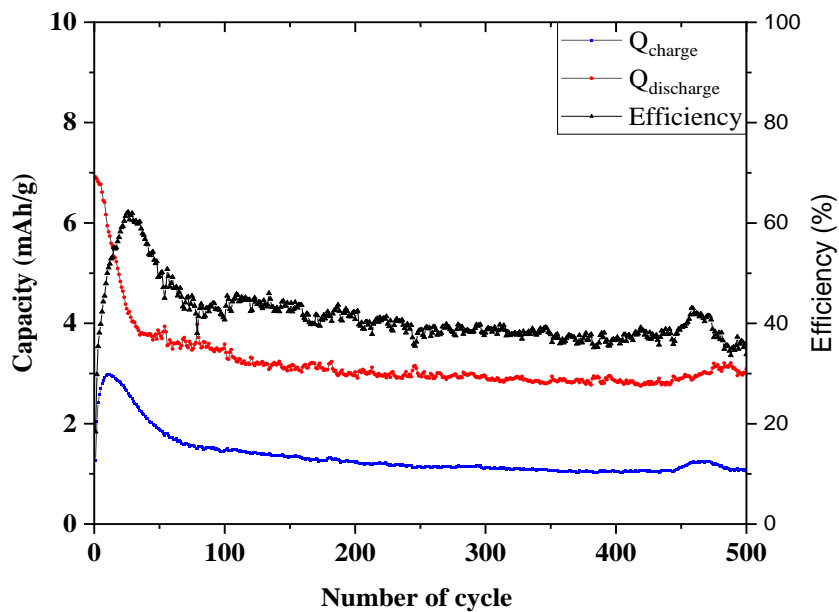

**Figure S4.** Capacity of RF in sodium acetate 1M at 10mV/s

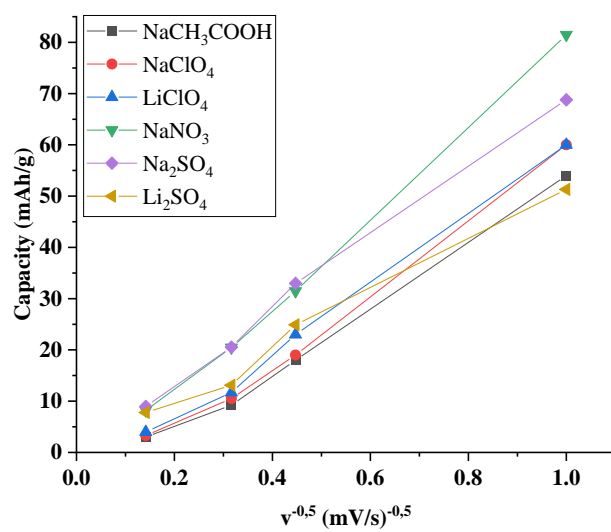

**Figure S5.** Evolution of capacity depending on scan rate and on the nature of the electrolyte salt.

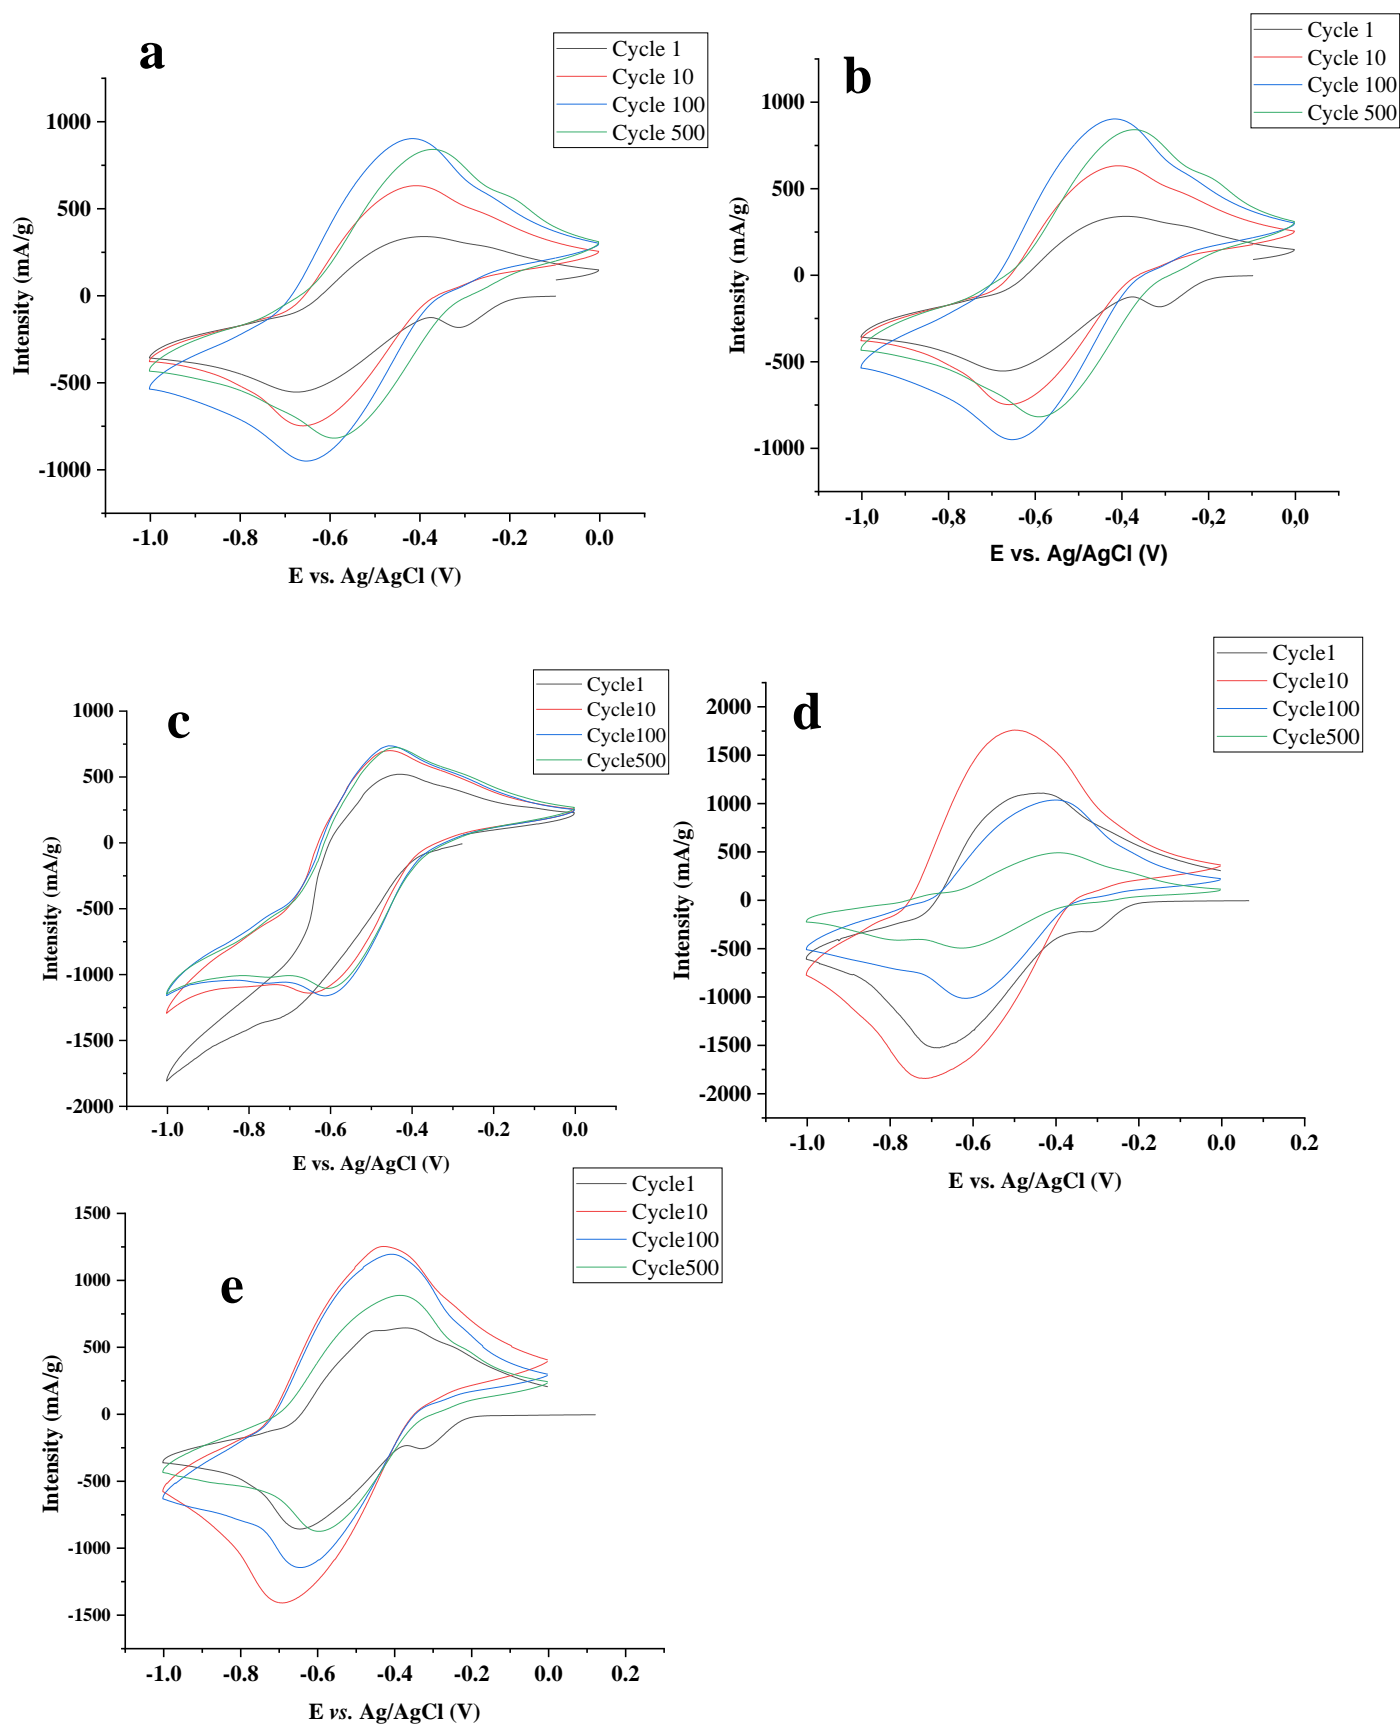

**Figure S6.** CV experiments of LDH-RF at 10mV/s in a 1M solution of (a) NaClO<sub>4</sub>, (b) LiClO<sub>4</sub>, (c) NaNO<sub>3</sub>, (d) Na<sub>2</sub>SO<sub>4</sub> and (e) Li<sub>2</sub>SO<sub>4</sub>

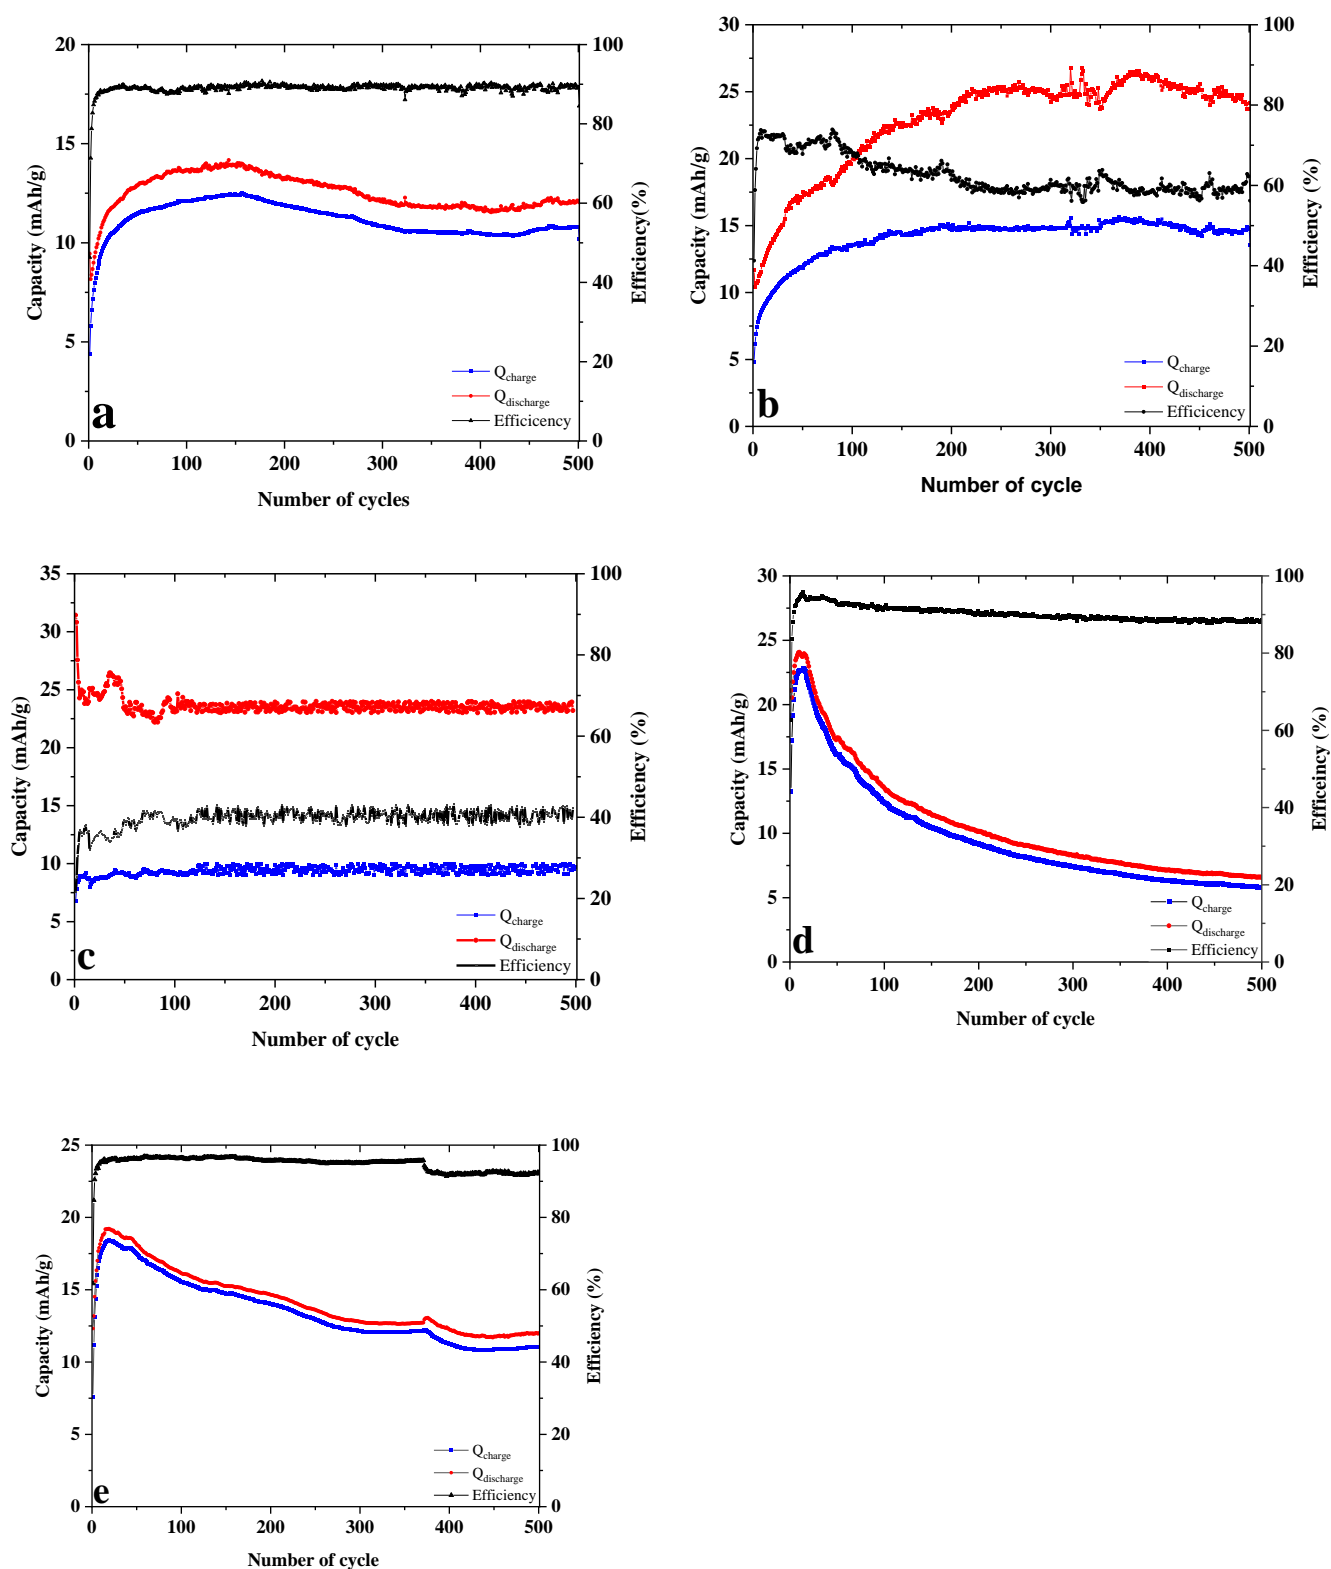

**Figure S7.** Capacity and efficiency of LDH-RF obtained at 10mV/s in a 1M solution of (a) NaClO<sub>4</sub>, (b) LiClO<sub>4</sub>, (c) NaNO<sub>3</sub>, (d) Na<sub>2</sub>SO<sub>4</sub> and (e) Li<sub>2</sub>SO<sub>4</sub>

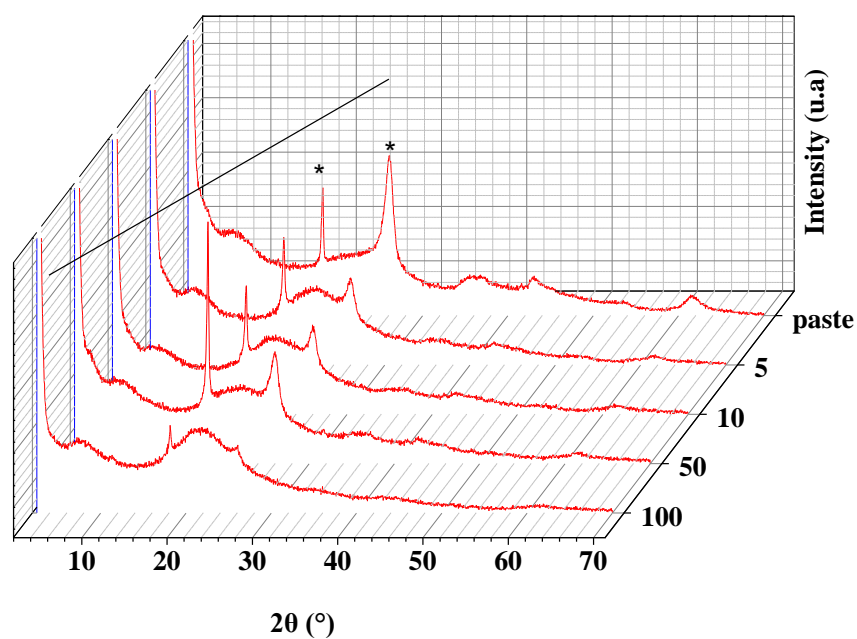

**Figure S8.** XRD of LDH-RF after 5<sup>th</sup>, 10<sup>th</sup>, 50<sup>th</sup> and 100<sup>th</sup> cycle in sodium acetate at 10mV/s

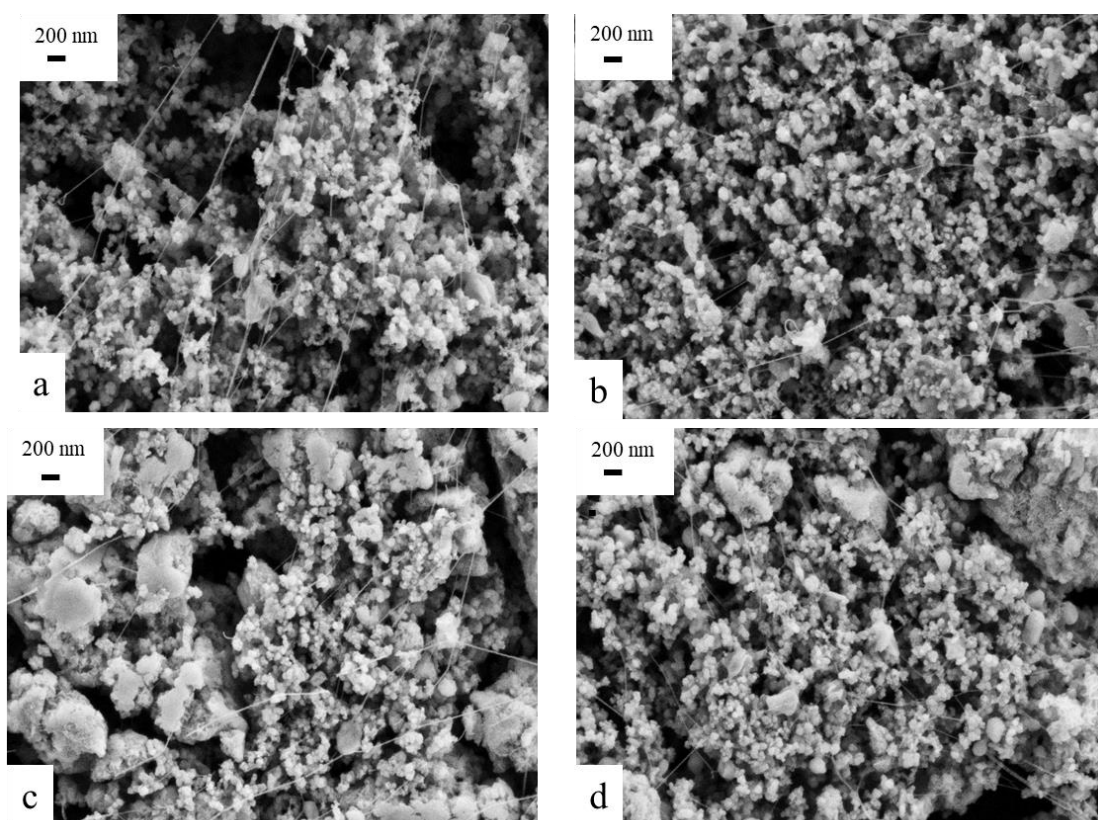

**Figure S9.** SEM images of LDH-RF paste (a) and post-mortem after 1<sup>st</sup> (b), 5<sup>th</sup> (c), 50<sup>th</sup> (d) cycle in sodium acetate at 10mV/s

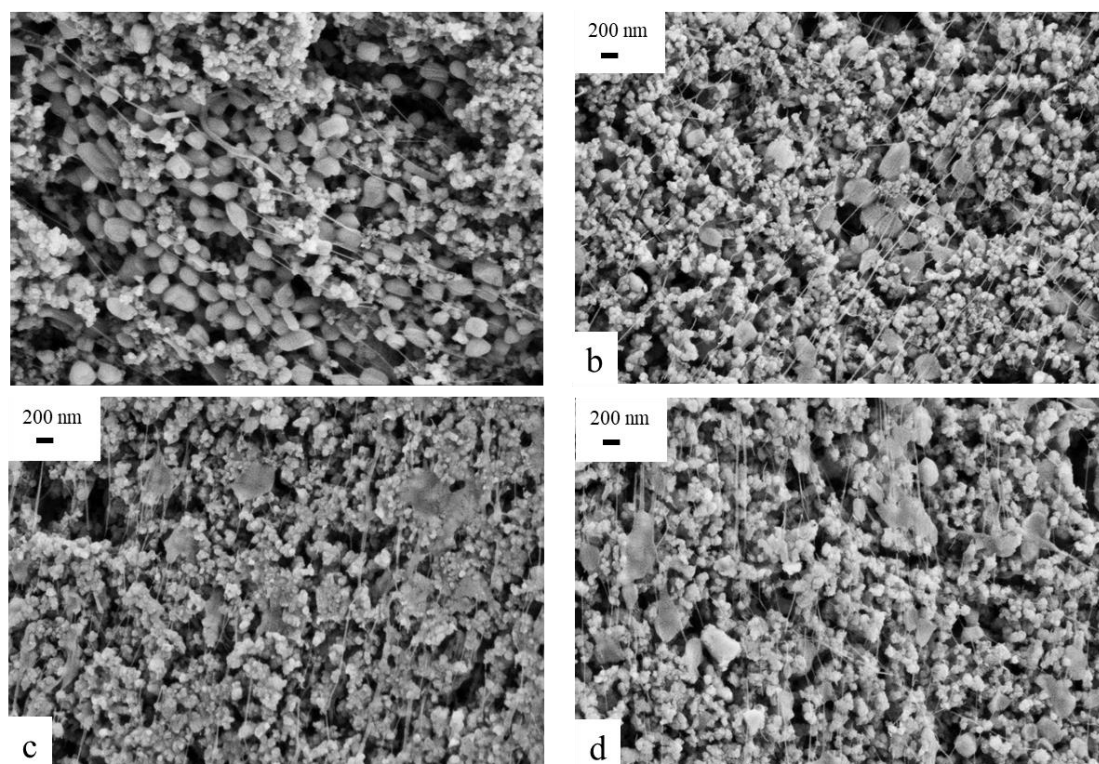

**Figure S10.** SEM images of LDH-FCm paste (a) and post-mortem after 1<sup>st</sup> (b), 5<sup>th</sup> (c), 50<sup>th</sup> (d) cycle in sodium acetate at 10mV/s

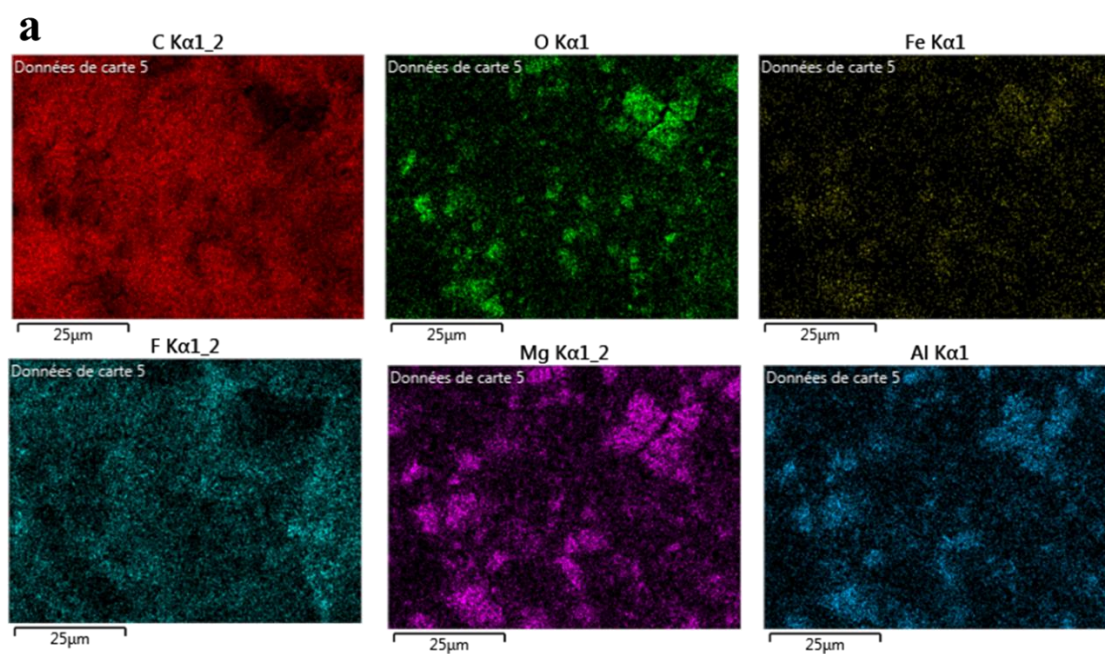

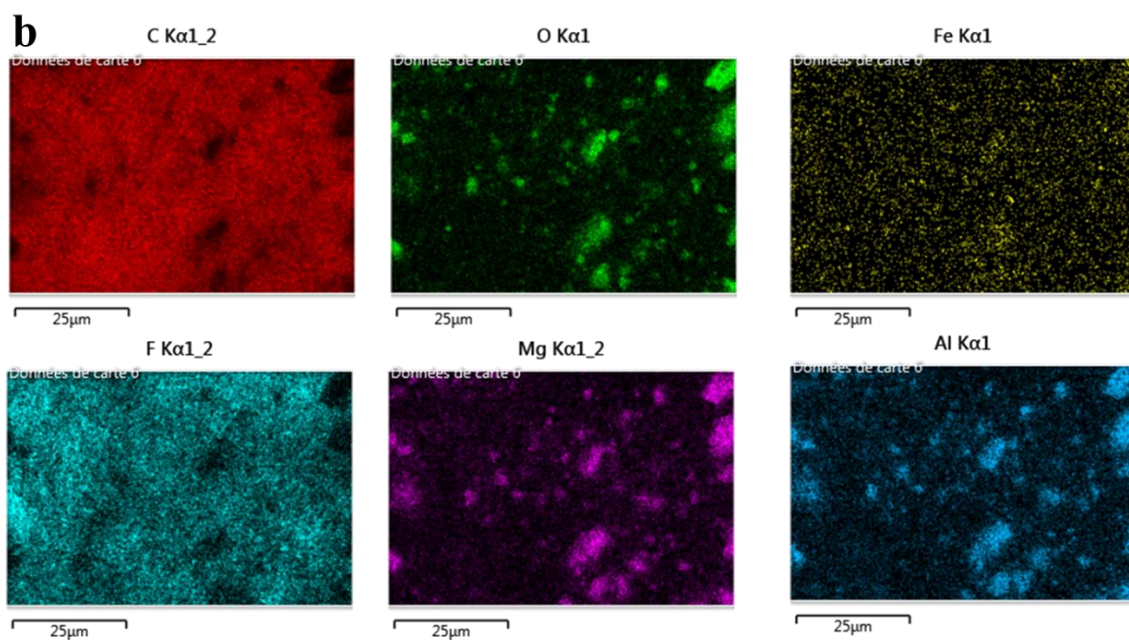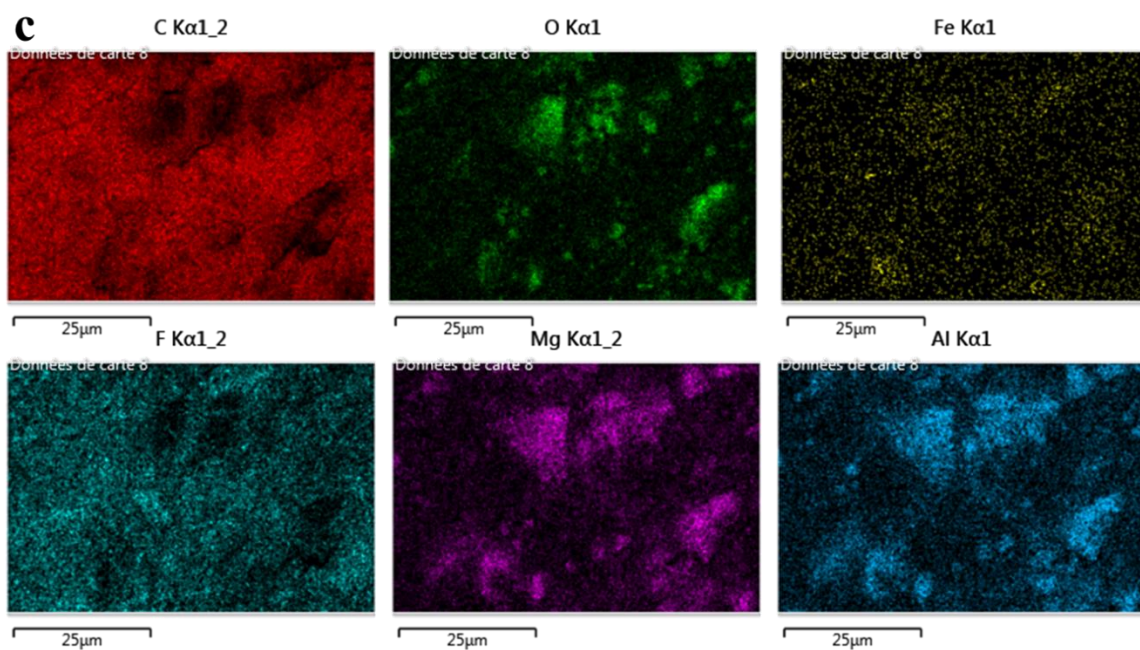

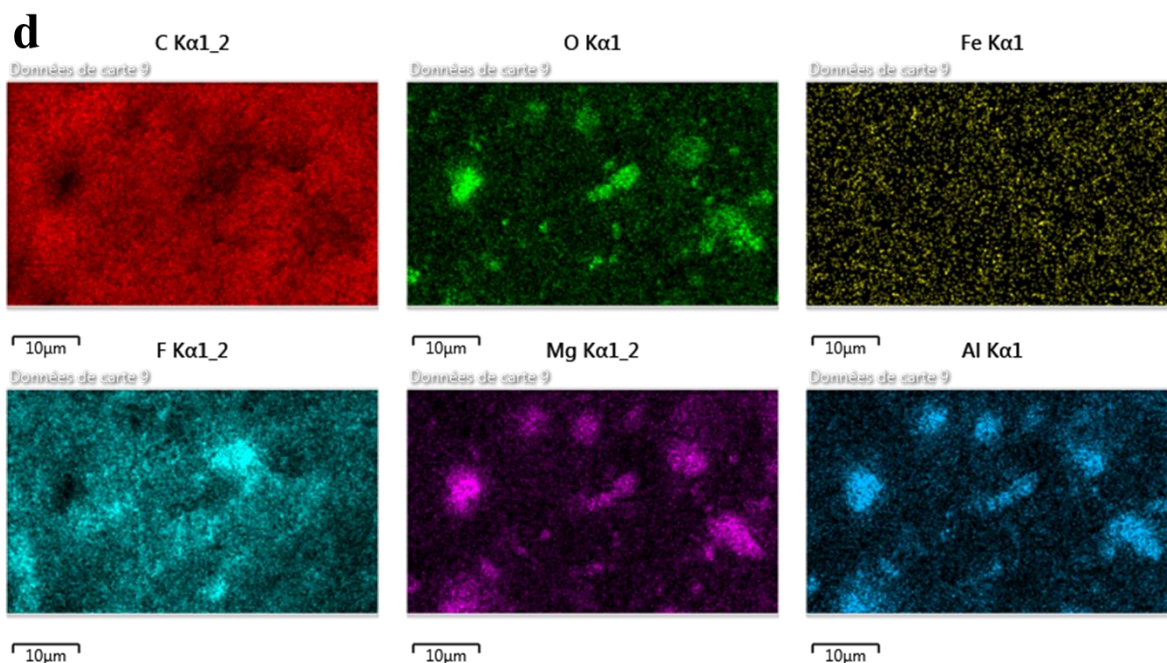

**Figure S11.** EDX mapping of (a) LDH-Fcm raw paste, LDH-FCm paste after (b) 1<sup>st</sup> cycle, (c) 5<sup>th</sup> cycle and (d) 50<sup>th</sup> in sodium acetate 1M at 10mV/s

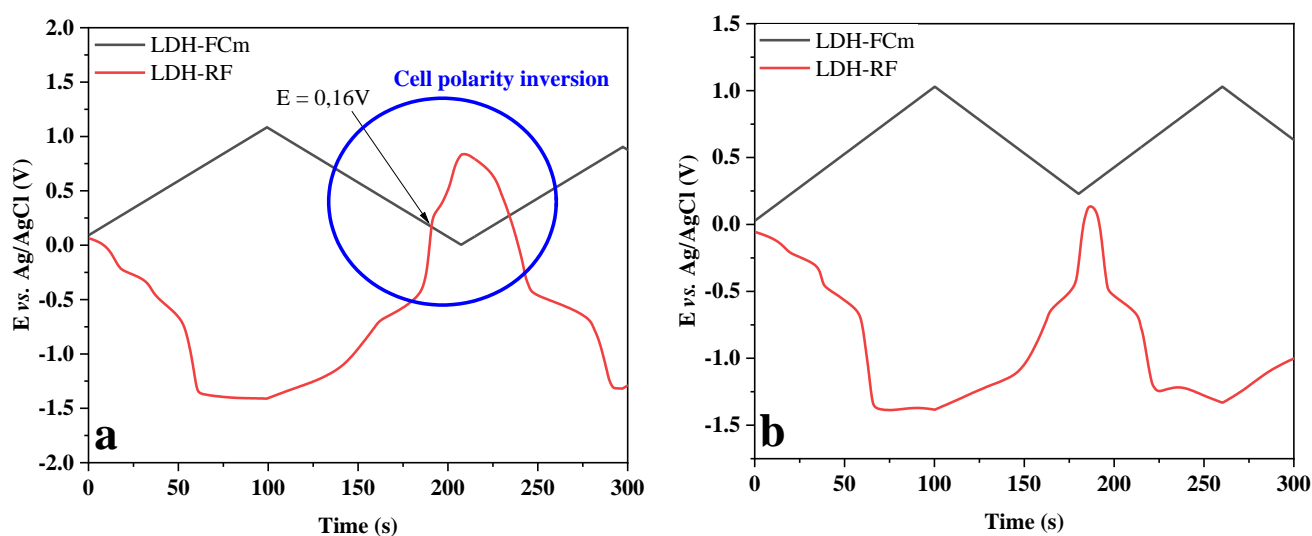

**Figure S12.** (a) Potential evolution of LDH-Fcm and LDH-RF electrodes in a complete cell with [0;1] V potential range imposed for LDH-Fcm in 1M sodium acetate at 10mV/s and (b) Potential evolution of LDH-Fcm and LDH-RF electrodes in a complete cell with [0,2;1] V potential range imposed for LDH-Fcm in 1M sodium acetate at 10mV/s

**Table S1:** Results of CV experiments of LDH-RF in different electrolyte at 1mV/s

| <i>Electrolyte</i>                  | <i>Eox</i><br>(V) | <i>Ered</i><br>(V) | <i>Qc<sub>1st</sub></i><br>cycle | <i>Qd<sub>1st</sub></i><br>cycle | <i>Efficiency</i><br>(%) | <i>Qc<sub>25th</sub></i><br>cycle | <i>Qd<sub>25th</sub></i><br>cycle | <i>Efficiency</i><br>(%) |
|-------------------------------------|-------------------|--------------------|----------------------------------|----------------------------------|--------------------------|-----------------------------------|-----------------------------------|--------------------------|
| <i>NaCH<sub>3</sub>COOH</i>         | -0.49             | -0.63              | 10.0                             | 30.4                             | 17                       | 21.0                              | 73.3                              | 29                       |
| <i>NaClO<sub>4</sub></i>            | -0.38             | -0.60              | 16.4                             | 70.0                             | 23                       | 19.0                              | 55.6                              | 34                       |
| <i>LiClO<sub>4</sub></i>            | -0.32             | -0.71              | 17.1                             | 54.0                             | 32                       | 25.2                              | 97.8                              | 26                       |
| <i>NaNO<sub>3</sub></i>             | -0.42             | -0.58              | 8.0                              | 81.4                             | 10                       | /                                 | /                                 | /                        |
| <i>Na<sub>2</sub>SO<sub>4</sub></i> | -0.57             | -0.74              | 25.9                             | 68.8                             | 37                       | /                                 | /                                 | /                        |
| <i>Li<sub>2</sub>SO<sub>4</sub></i> | -0.39             | -0.74              | 28.1                             | 51.2                             | 55                       | 10.3                              | 24.7                              | 41                       |

**Table S2:** Results of CV experiments of LDH-FCd in different electrolyte at 1mV/s

| <i>Electrolyte</i>                  | <i>Eox</i><br>(V) | <i>Ered</i><br>(V) | <i>Qc<sub>1st</sub></i><br>cycle | <i>Qd<sub>1st</sub></i><br>cycle | <i>Efficiency</i><br>(%) | <i>Qc<sub>5th</sub></i><br>cycle | <i>Qd<sub>5th</sub></i><br>cycle | <i>Efficiency</i><br>(%) |
|-------------------------------------|-------------------|--------------------|----------------------------------|----------------------------------|--------------------------|----------------------------------|----------------------------------|--------------------------|
| <i>NaCH<sub>3</sub>COOH</i>         | 0.50              | 0.38               | 5.3                              | 2.3                              | 43                       | 1.1                              | 0.8                              | 73                       |
| <i>NaClO<sub>4</sub></i>            | 0.55              | 0.42               | 9.0                              | 2.9                              | 32                       | 4.0                              | 3.4                              | 86                       |
| <i>LiClO<sub>4</sub></i>            | 0.61              | 0.40               | 6.4                              | 2.7                              | 40                       | 6.5                              | 4.9                              | 75                       |
| <i>Na<sub>2</sub>SO<sub>4</sub></i> | 0.65              | 0.51               | 14.3                             | 2.5                              | 18                       | 4.8                              | 2.1                              | 46                       |
| <i>Li<sub>2</sub>SO<sub>4</sub></i> | 0.59              | 0.51               | 9.5                              | 1.1                              | 12                       | 0.8                              | 0.2                              | 30                       |

**Table S3:** Results of CV experiments of LDH-FCm in different electrolyte salts at 1mV/s

| <i>Electrolyte</i>                  | <i>Eox</i><br>(V) | <i>Ered</i><br>(V) | <i>Qc<sub>1st</sub></i><br>cycle | <i>Qd<sub>1st</sub></i><br>cycle | <i>Efficiency</i><br>(%) | <i>Qc<sub>5th</sub></i><br>cycle | <i>Qd<sub>5th</sub></i><br>cycle | <i>Efficiency</i><br>(%) |
|-------------------------------------|-------------------|--------------------|----------------------------------|----------------------------------|--------------------------|----------------------------------|----------------------------------|--------------------------|
| <i>NaCH<sub>3</sub>COOH</i>         | 0.38              | 0.29               | 59.9                             | 38.8                             | 65                       | 6.2                              | 0.9                              | 15                       |
| <i>NaClO<sub>4</sub></i>            | 0.52              | 0.32               | 60.1                             | 28.4                             | 47                       | 19.0                             | 11.2                             | 59                       |
| <i>LiClO<sub>4</sub></i>            | 0.62              | 0.22               | 60.6                             | 24.0                             | 40                       | 25.5                             | 18.7                             | 72                       |
| <i>Na<sub>2</sub>SO<sub>4</sub></i> | 0.53              | 0.27               | 59.3                             | 2.8                              | 4.7                      | 5.6                              | 0.6                              | 10                       |
| <i>Li<sub>2</sub>SO<sub>4</sub></i> | 0.48              | 0.28               | 57.6                             | 0.5                              | 0.8                      | 4.0                              | 0.4                              | 10                       |
